# Supplementary material
Source: publisher figshare collection journal article supplement (https://sage.figshare.com/ndownloader/files/18238436)
Supplement: Supplementary file 1 [file 18238436]

## Supplementary Data Appendix

### The Rise of Democratic Rhetoric: Why International Organizations Adopt Democratic Legitimation Narratives

August 2019

This document supplements the information provided in AUTHOR “The Rise of Democratic Rhetoric: Why International Organizations Adopt Democratic Legitimation Narratives”. This Supplementary appendix presents the sample of international organizations (IOs), the operationalization of variables, and shows alternative models not shown in full in the paper.

#### Table of Contents

|                                                                                                                                                                                                                                               |    |
|-----------------------------------------------------------------------------------------------------------------------------------------------------------------------------------------------------------------------------------------------|----|
| A1 Sample of international organizations.....                                                                                                                                                                                                 | 1  |
| A1.1 IO Sample .....                                                                                                                                                                                                                          | 1  |
| A1.2 Excluded IOs .....                                                                                                                                                                                                                       | 3  |
| A2 Operationalization of dependent variable.....                                                                                                                                                                                              | 3  |
| A2.1 Versions of dependent variable.....                                                                                                                                                                                                      | 3  |
| A2.2 Democratic legitimation by IOs.....                                                                                                                                                                                                      | 4  |
| A2.3 Overview by year.....                                                                                                                                                                                                                    | 5  |
| A2.4 Correlation matrix.....                                                                                                                                                                                                                  | 6  |
| A2.5 Distribution of dependent variable.....                                                                                                                                                                                                  | 6  |
| A3 Operationalization of explanatory variables.....                                                                                                                                                                                           | 7  |
| A3.1 Authority-legitimation link .....                                                                                                                                                                                                        | 7  |
| A3.2 Alternative explanations: membership, design, politicization .....                                                                                                                                                                       | 9  |
| A3.3 Controls .....                                                                                                                                                                                                                           | 13 |
| A4 Modelling.....                                                                                                                                                                                                                             | 14 |
| A4.1 Final model (negative binomial regression, dependent variable: count of democratic legitimation, with different lagged DVs, IO dummies omitted from output) .....                                                                        | 14 |
| A4.2 Robustness: Logistic regression model (dependent variable: dichotomous variable for democratic legitimation/no democratic legitimation, IO dummies omitted from output).....                                                             | 15 |
| A4.3 Robustness: Authority (negative binomial regression, dependent variable: count of democratic legitimation, with three alternative specifications of the authority variable, IO dummies omitted from output) .....                        | 16 |
| A4.4 Robustness: Democratic membership (negative binomial regression, dependent variable: count of democratic legitimation, with three alternative specifications of the democratic membership variable, IO dummies omitted from output)..... | 17 |
| A4.5 Robustness: Economic inequality (negative binomial regression, dependent variable: count of democratic legitimation, with one alternative specification of the weak member state variable, IO dummies omitted from output).....          | 18 |
| A5: Table: Types of arguments linked to democratic legitimation .....                                                                                                                                                                         | 19 |
| A6 References .....                                                                                                                                                                                                                           | 20 |

# A1 Sample of international organizations

## A1.1 IO Sample

The following table provides an overview of the IOs in our sample. The values for IO purpose are based on the FIGO dataset (Volgy et al. 2008).

| Organization                                         | Acronym | Inception | Purpose                | Time period | Years covered | Coded para. | Leg. intensity | Share of democratic legitimation |
|------------------------------------------------------|---------|-----------|------------------------|-------------|---------------|-------------|----------------|----------------------------------|
| Bank for International Settlements                   | BIS     | 1930      | Economic               | 1980-2011   | 32            | 1912        | .12            | .02                              |
| Commonwealth of Nations                              | CON     | 1965      | Political/<br>Military | 1980-2011   | 16            | 843         | .40            | .23                              |
| Global Environmental Facility                        | GEF     | 1991      | Economic               | 1995-2011   | 15            | 820         | .26            | .12                              |
| International Atomic Energy Agency                   | IAEA    | 1957      | Political/<br>Military | 1980-2011   | 31            | 1578        | .19            | .01                              |
| World Bank                                           | IBRD    | 1944      | Economic               | 1980-2011   | 32            | 1904        | .26            | .07                              |
| International Civil Aviation Organization            | ICAO    | 1947      | Economic               | 1980-2011   | 31            | 1920        | .08            | .01                              |
| International Criminal Court                         | ICC     | 2002      | Social                 | 2004-2011   | 7             | 420         | .18            | .06                              |
| International Labour Organization                    | ILO     | 1919      | Social                 | 1980-2011   | 32            | 1884        | .25            | .08                              |
| International Monetary Fund                          | IMF     | 1944      | Economic               | 1980-2011   | 32            | 1583        | .30            | .08                              |
| International Seabed Authority                       | ISBA    | 1994      | Social                 | 1997-2011   | 15            | 884         | .10            | 0                                |
| International Whaling Commission                     | IWC     | 1946      | Economic               | 1980-2011   | 31            | 1381        | .06            | .04                              |
| Permanent Court of Arbitration                       | PCA     | 1899      | Social                 | 1980-2011   | 31            | 1212        | .15            | 0                                |
| Organization for Economic Co-operation & Development | OECD    | 1961      | Economic               | 1980-2011   | 32            | 1234        | .28            | .05                              |
| Organization of Petroleum Exporting Countries        | OPEC    | 1960      | Economic               | 1980-2011   | 29            | 1359        | .13            | .01                              |

## A1.1 IO Sample, continued

| Organization                                                     | Acronym | Inception     | Purpose  | Time period | Years covered | Coded para. | Leg. intensity | Share of democratic legitimization |
|------------------------------------------------------------------|---------|---------------|----------|-------------|---------------|-------------|----------------|------------------------------------|
| Organization for Security and Cooperation in Europe              | OSCE    | 1975          | General  | 1993-2011   | 18            | 816         | .29            | .18                                |
| United Nations                                                   | UN      | 1945          | General  | 1980-2011   | 32            | 1892        | .32            | .12                                |
| United Nations Educational, Scientific and Cultural Organization | UNESCO  | 1945          | Social   | 1980-2011   | 15            | 790         | .21            | .09                                |
| United Nations Industrial Development Organization               | UNIDO   | 1967          | Economic | 1980-2011   | 30            | 1472        | .25            | .03                                |
| World Meteorological Organization                                | WMO     | 1947          | Economic | 1980-2005   | 26            | 1196        | .22            | .01                                |
| World Trade Organization                                         | WTO     | 1947/<br>1995 | Economic | 1980-2011   | 30            | 1644        | .21            | .13                                |
| Total (Mean)                                                     |         |               |          |             | 516           | 26753       | (.21)          | (.07)                              |

## A1.2 Excluded IOs

For the following organizations, we lacked access to English-language annual reports for a sufficient amount of years. Values for IO purpose are based on the FIGO dataset (Volgy et al. 2008).

| Organization                                            | Acronym  | Inception | Purpose            |
|---------------------------------------------------------|----------|-----------|--------------------|
| Asia-Pacific Economic Cooperation                       | APEC     | 1989      | Economic           |
| Central Office for International Railway Transport      | OCTI     | 1890      | Economic           |
| Food and Agriculture Organization of the United Nations | FAO      | 1945      | Economic           |
| International Criminal Police Organization              | INTERPOL | 1923      | Social             |
| International Maritime Organization                     | IMO      | 1948      | Economic           |
| International Organization for Migration                | IOM      | 1951      | Political/Military |
| International Telecom Union                             | ITU      | 1865      | Economic           |
| North Atlantic Treaty Organization                      | NATO     | 1949      | Political/Military |
| Organization of American States                         | OAS      | 1980      | General            |
| South Pacific Commission                                | SPC      | 1947      | General            |
| Universal Postal Union                                  | UPU      | 1874      | Economic           |
| World Customs Organization                              | WCO      | 1950      | Economic           |
| World Health Organization                               | WHO      | 1946      | Social             |
| World Intellectual Property Organization                | WIPO     | 1967      | Economic           |
| World Tourism Organization                              | UNWTO    | 1975      | Economic           |

## A2 Operationalization of dependent variable

### A2.1 Versions of dependent variable

The dependent variable is the count of paragraphs in IO annual reports that use democratic legitimization narratives, that is, identity or purpose revealing language that links the organization to democratic norms. We have calculated several variations of our dependent variable. The following table summarizes those variables.

#### *Descriptive statistic on dependent variables*

|          | N   | Mean  | St. Dev. | Min | Max |
|----------|-----|-------|----------|-----|-----|
| n_DemIO  | 516 | 0.620 | 1.343    | 0   | 11  |
| n_DRall  | 516 | 0.959 | 1.912    | 0   | 15  |
| n_Dthin  | 516 | 0.355 | 1.005    | 0   | 11  |
| n_Dthick | 516 | 0.368 | 0.845    | 0   | 6   |
| n_DPromo | 516 | 0.339 | 1.120    | 0   | 11  |

- n\_DRall is the count of all democratic legitimization
- n\_DemIO is the count of all procedural democratic legitimization
- n\_Dthin is the count of thin procedural democratic legitimization
- n\_Dthick is the count of thick procedural democratic legitimization

## A2.2 Democratic legitimization by IOs

| IO     | Coded para. | Mean share of legitimization statements | Mean share of dem. leg. | n_DemIO | n_Dthin | n_Dthick | n_DRall |
|--------|-------------|-----------------------------------------|-------------------------|---------|---------|----------|---------|
| BIS    | 1912        | 0.12                                    | 0.02                    | 6       | 3       | 3        | 6       |
| CON    | 843         | 0.40                                    | 0.23                    | 20      | 6       | 30       | 86      |
| GEF    | 820         | 0.26                                    | 0.12                    | 21      | 12      | 9        | 21      |
| IAEA   | 1578        | 0.19                                    | 0.01                    | 5       | 3       | 2        | 5       |
| ICAO   | 1920        | 0.08                                    | 0.01                    | 2       | 1       | 1        | 2       |
| ICC    | 420         | 0.18                                    | 0.06                    | 7       | 6       | 2        | 7       |
| ILO    | 1884        | 0.25                                    | 0.08                    | 16      | 2       | 19       | 41      |
| IMF    | 1583        | 0.30                                    | 0.08                    | 41      | 32      | 16       | 48      |
| ISBA   | 884         | 0.10                                    | 0.00                    | 0       | 0       | 0        | 0       |
| IWC    | 1381        | 0.06                                    | 0.04                    | 8       | 7       | 4        | 8       |
| OECD   | 1243        | 0.28                                    | 0.05                    | 20      | 3       | 18       | 28      |
| OPEC   | 1359        | 0.13                                    | 0.01                    | 1       | 0       | 1        | 2       |
| OSCE   | 816         | 0.29                                    | 0.18                    | 17      | 10      | 13       | 47      |
| PCA    | 1212        | 0.15                                    | 0.00                    | 0       | 0       | 0        | 0       |
| IBRD   | 1904        | 0.26                                    | 0.07                    | 28      | 16      | 13       | 40      |
| UN     | 1892        | 0.32                                    | 0.12                    | 66      | 45      | 23       | 82      |
| UNESCO | 790         | 0.21                                    | 0.09                    | 9       | 1       | 9        | 19      |
| UNIDO  | 1472        | 0.25                                    | 0.03                    | 15      | 13      | 3        | 15      |
| WMO    | 1196        | 0.22                                    | 0.01                    | 2       | 2       | 0        | 2       |
| WTO    | 1644        | 0.21                                    | 0.13                    | 36      | 21      | 24       | 36      |

## A2.3 Democratic legitimization by year

| Year | Coded para. | Mean share of legitimization statements | Mean share of dem. leg. | n_DemIO | n_Dthin | n_Dthick | n_DRall |
|------|-------------|-----------------------------------------|-------------------------|---------|---------|----------|---------|
| 1980 | 360         | 0.12                                    | 0.01                    | 1       | 0       | 1        | 1       |
| 1981 | 813         | 0.16                                    | 0.01                    | 1       | 0       | 2        | 4       |
| 1982 | 669         | 0.14                                    | 0.02                    | 1       | 0       | 1        | 2       |
| 1983 | 794         | 0.14                                    | 0.00                    | 1       | 0       | 1        | 1       |
| 1984 | 766         | 0.15                                    | 0.01                    | 1       | 0       | 1        | 2       |
| 1985 | 849         | 0.15                                    | 0.02                    | 3       | 0       | 3        | 4       |
| 1986 | 767         | 0.13                                    | 0.01                    | 1       | 0       | 1        | 2       |
| 1987 | 774         | 0.14                                    | 0.01                    | 2       | 2       | 0        | 2       |
| 1988 | 754         | 0.15                                    | 0.02                    | 4       | 0       | 4        | 4       |
| 1989 | 764         | 0.13                                    | 0.02                    | 2       | 0       | 4        | 5       |
| 1990 | 648         | 0.15                                    | 0.01                    | 1       | 0       | 1        | 2       |
| 1991 | 760         | 0.20                                    | 0.05                    | 5       | 3       | 2        | 12      |
| 1992 | 785         | 0.19                                    | 0.05                    | 4       | 1       | 3        | 10      |
| 1993 | 768         | 0.18                                    | 0.07                    | 6       | 3       | 5        | 14      |
| 1994 | 746         | 0.21                                    | 0.06                    | 7       | 2       | 5        | 13      |
| 1995 | 769         | 0.20                                    | 0.08                    | 14      | 7       | 9        | 22      |
| 1996 | 901         | 0.21                                    | 0.07                    | 10      | 6       | 8        | 20      |
| 1997 | 898         | 0.21                                    | 0.06                    | 5       | 3       | 2        | 18      |
| 1998 | 869         | 0.21                                    | 0.03                    | 5       | 1       | 6        | 7       |
| 1999 | 894         | 0.25                                    | 0.06                    | 8       | 5       | 7        | 19      |
| 2000 | 910         | 0.23                                    | 0.09                    | 17      | 11      | 11       | 22      |
| 2001 | 862         | 0.28                                    | 0.12                    | 22      | 17      | 14       | 38      |
| 2002 | 883         | 0.25                                    | 0.07                    | 12      | 7       | 8        | 14      |
| 2003 | 897         | 0.29                                    | 0.11                    | 17      | 13      | 10       | 27      |
| 2004 | 868         | 0.23                                    | 0.10                    | 12      | 10      | 6        | 15      |
| 2005 | 1065        | 0.26                                    | 0.13                    | 26      | 18      | 12       | 40      |
| 2006 | 988         | 0.28                                    | 0.08                    | 19      | 12      | 6        | 27      |
| 2007 | 969         | 0.29                                    | 0.08                    | 22      | 13      | 10       | 32      |
| 2008 | 920         | 0.24                                    | 0.08                    | 25      | 20      | 7        | 29      |
| 2009 | 1012        | 0.25                                    | 0.07                    | 21      | 11      | 10       | 25      |
| 2010 | 1029        | 0.25                                    | 0.10                    | 18      | 8       | 12       | 25      |
| 2011 | 1002        | 0.28                                    | 0.12                    | 27      | 10      | 18       | 37      |

## A2.4 Correlation matrix

Looking at simple correlation, we see that, as expected, most variations of the variables correlate highly. However, the thin and thick versions of democratic legitimization only correlate lightly and are thus rather distinct phenomena.

|          | n_DemIO | n_DRall | n_Dthin | n_Dthick | n_DPromo |
|----------|---------|---------|---------|----------|----------|
| n_DemIO  |         |         |         |          |          |
| n_DRall  | 0.8188  |         |         |          |          |
| n_Dthin  | 0.8565  | 0.6706  |         |          |          |
| n_Dthick | 0.7406  | 0.7590  | 0.3671  |          |          |
| n_DPromo | 0.1981  | 0.7249  | 0.1172  | 0.4073   |          |

## A2.5 Distribution of dependent variable

Further, looking at the distribution of our main dependent variable – n\_DRall – we see that it closely resembles a negative binomial distribution.

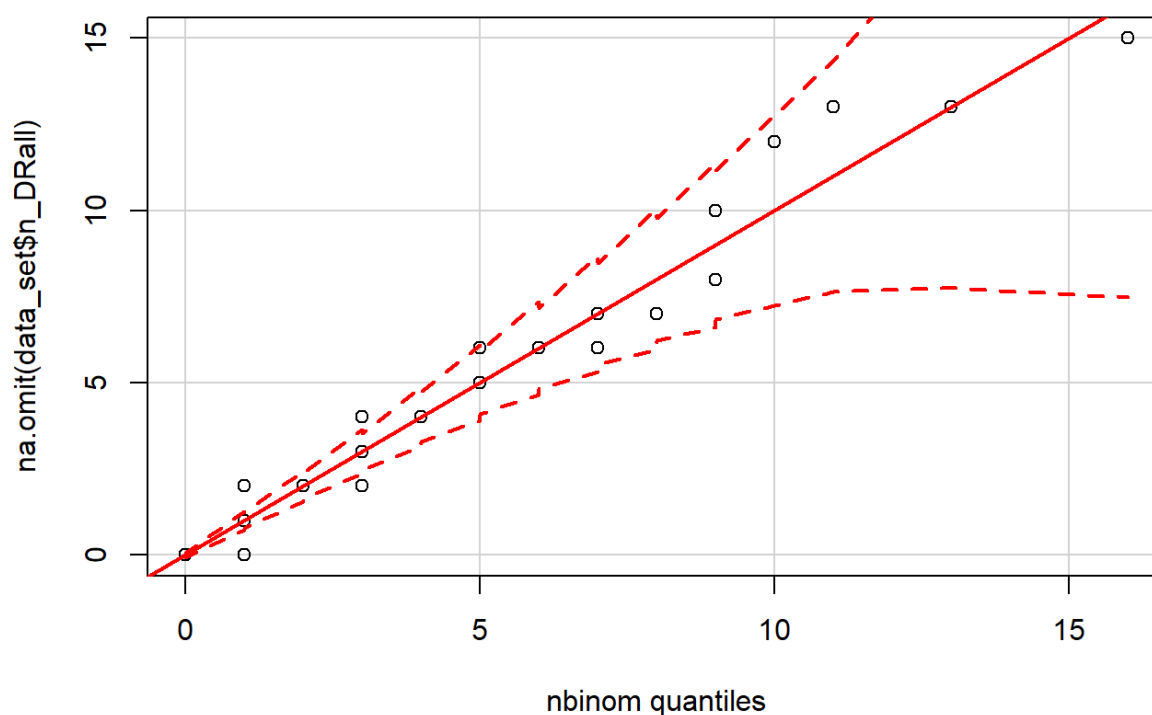

The test statistics of a Two-sample Kolmogorov-Smirnov Test show that the `n_DRall` variable closely resembles a negative binomial distribution.

Data: Tr and Co

$D = 0.027132$ ,  $p\text{-value} = 0.9913$

Alternative hypothesis: two-sided

## A3 Operationalization of explanatory variables

In the following section, we present our selection and operationalization of independent variables.

### A3.1 Authority-legitimation link

#### *Authority*

First, we operationalize the **authority** of IOs with the help of the MIA dataset by Liesbet Hooghe and colleagues (2017) on the pooling and delegation of IO authority at IOs. This dataset provides information on the number of tasks delegated to and the number of decisions pooled at IOs for all IOs in our sample. It covers the period between 1950 and 2010. Hence, the final year of our observation period is not covered by this data.

We combine these data with information from the FIGO dataset, which classifies IOs according to their purpose (“economic”, “general”, “political/military”, “social”) (Volgy et al. 2008). We add data for missing IOs according to the FIGO coding rules. We use this data on IO purpose as a proxy for IO issue intrusiveness, with which we weigh IO authority. IOs with a general-purpose have a very intrusive issue scope (3), economic purpose IOs have a lower but still intrusive issue scope (2) and political/military and social purpose IOs have a less intrusive issue scope (1). After matching our IOs and years to the MIA dataset, we created four versions of the authority variable:

- Authority (main variable): the sum of MIA scores for `delpolicy` (delegation of authority on the policy-making dimension) and `poolpolicy` (pooling of authority on the policy-making dimension). With this variable, we zero in on the policy-making authority of IOs, because we expect that this part of IO authority creates the strongest legitimation pressures.



- Authority  $\times$  intrusiveness: Authority (first robustness check) multiplied with the intrusiveness variable. This variable weighs the policy-making authority of an IO with its intrusiveness.
- Authority in all areas (second robustness check): the sum of MIA scores on delegation (annual IO average of delegation, adjusted for bindingness and ratification, scaled to 0-1) and pooling (annual IO average of pooling, adjusted for bindingness and ratification, scaled to 0-1). This variable simply combines the scores for delegated and pooled authority.
- Authority in all areas  $\times$  intrusiveness (third robustness check): Authority in all areas multiplied with the intrusiveness variable derived from the FIGO dataset. This variable weighs the overall authority of an IO with its intrusiveness.

#### *Descriptive statistics on authority measures*

|                                               | N   | Mean  | St. dev. | Min   | Max   |
|-----------------------------------------------|-----|-------|----------|-------|-------|
| Authority                                     | 480 | 0.506 | 0.239    | 0.111 | 1.071 |
| Authority $\times$ intrusiveness              | 480 | 0.865 | 0.463    | 0.192 | 2.143 |
| Authority in all areas                        | 480 | 0.451 | 0.193    | 0.066 | 0.772 |
| Authority in all areas $\times$ intrusiveness | 480 | 0.771 | 0.387    | 0.066 | 1.472 |

As the following correlation matrix illustrates, the related measures of authority correlate with each other, but none is a strong predictor of the count of democratic legitimization.

#### *Correlation matrix for authority measures*

|                                               | n_DRall | Authority | Authority $\times$ intrusiveness | Authority in all areas | Authority in all areas $\times$ intrusiveness |
|-----------------------------------------------|---------|-----------|----------------------------------|------------------------|-----------------------------------------------|
| n_DRall                                       |         |           |                                  |                        |                                               |
| Authority                                     | -0.0795 |           |                                  |                        |                                               |
| Authority $\times$ intrusiveness              | 0.0260  | 0.6373    |                                  |                        |                                               |
| Authority in all areas                        | -0.1287 | 0.5865    | 0.2450                           |                        |                                               |
| Authority in all areas $\times$ intrusiveness | -0.0295 | 0.3688    | 0.6845                           | 0.6714                 |                                               |

### A3.2 Alternative explanations: membership, design, politicization

#### *Democratic density*

First, we operationalize the **democratic quality of IO member states** with the help of the Polity IV dataset on the democratic quality of states (Marshall et al. 2016). This dataset combines a number of dimension into an index which measures the democratic quality of states per year. It provides data for member states of the IOs in our sample for the period 1800-2015. For IO membership information, we rely on the COW-2 International Organizations Dataset, which provides annual membership information for IOs (Pevehouse et al. 2004). We add missing membership information. We use the combined information to create our measure of IO democratic density:

- Democratic density (main variable): mean value of Polity IV score for IO member states in a given IO-year. This measure tells us the average democratic quality of an IO's membership in a given year.

Alternatively, we create a measure of democratic density using the democracy-dictatorship dataset (Cheibub et al. 2010). This dataset classifies states as being either a democracy or a dictatorship:

- Democracy-Dictatorship (first robustness check): share of IO member states which are considered democratic according to the democracy-dictatorship dataset. Like DM.share, this indicator tells us the share of democratic member states of an IO in a given year.

Based on the same data, we calculate alternative variables that may explain the usage of democratic legitimation.

- Young democracies (second robustness check): We assume that there may be an effect of young democracies on the democratic legitimation of IOs. Thus, we identify young democracies (that is, states that have taken the threshold to democracy according to the democracy-dictatorship dataset in the previous year) and then calculate the share of those in each IO-year.
- Major power democracies (third robustness check): Finally, we calculate a variable that assigns 1 to IO-years during which major democratic powers (France, UK, USA, Germany post-1990, Japan post-1990) are unchallenged by major autocratic powers (China, Russia) in a given IO-year.

The following correlation matrix shows that, as expected, the alternative calculations for the share of democratic member states and the mean of Polity IV values correlate highly. The young democracies share, however, appears to measure a very distinct feature of IOs, that is not directly related to the overall democratic membership of IOs.

*Correlation matrix for IO membership variables*

|                         | n_DRall | Democracy-Dictatorship | Democratic density | Young democracies | Major power democracies |
|-------------------------|---------|------------------------|--------------------|-------------------|-------------------------|
| n_DRall                 |         |                        |                    |                   |                         |
| Democracy-Dictatorship  | 0.0969  |                        |                    |                   |                         |
| Democratic density      | 0.1458  | 0.9868                 |                    |                   |                         |
| Young democracies       | -0.0924 | -0.1314                | -0.1762            |                   |                         |
| Major power democracies | 0.1209  | 0.4426                 | 0.4089             | -0.0654           |                         |

*Weak IO members*

We create a measure of weak IO member states using data provided by the UN Committee for Development Policy Secretariat on the developmental status of states (2017). This data provides a list of least developed countries (LDCs) in a given year. We use this information, combined with COW data on IO-membership, to create a measure of IO inequality for the period 1980-2011:

- Weak IO members: share of LDCs per IO-year. This indicator tells the share of LDCs in an IO's membership in a given IO-year.

Alternatively, we operationalize economic inequality of IO member states with the help of data from the Penn World Tables dataset on the real GDP of IO member states at constant 2005 national prices in 2005 U.S. Dollar (Feenstra et al. 2015). We combine this data with COW IO membership information. We use this to create a measure of IO inequality for the period 1980-2011:

- Economic inequality (Gini): Gini coefficient for all IO member states in a given IO-year.

The following correlation matrix illustrates that both correlate highly with each other, but only weakly to our main dependent variable.

### *Correlation matrix for economic inequality among IO members*

|                            | n_DRall | Economic inequality (Gini) | Weak IO members |
|----------------------------|---------|----------------------------|-----------------|
| n_DRall                    |         |                            |                 |
| Economic inequality (Gini) |         | 0.2088                     |                 |
| Weak IO members e          |         | 0.1313                     | 0.723           |

### *Democratic institutional features*

We test if democratic design features of IOs influence the use of democratic legitimation. Our main measure of this concept is an index of institutional IO democracy. The index is composed of the following five dimensions and indicators. It provides annual data for all IOs in the sample and the period between 1980-2011.

### *Index of democratic institutional features*

| Indicator                                   | Score | Explanation                                                                         | Source                                                        |
|---------------------------------------------|-------|-------------------------------------------------------------------------------------|---------------------------------------------------------------|
| Fair state representation                   | 0     | Executive council with limited membership and seats reserved for specific countries | IO statutes                                                   |
|                                             | 1     | Executive council with limited membership                                           |                                                               |
|                                             | 2     | No executive council or major decisions only made in General Assembly               |                                                               |
| Fair voting                                 | 0     | Weighted voting                                                                     | Blake and Payton (2015), own research                         |
|                                             | 1     | Unanimity voting                                                                    |                                                               |
| CSO access                                  | 0     | Absent or passive participation in General Assembly                                 | Transaccess dataset (Tallberg et al. 2013), own research      |
|                                             | 1     | Active and indirect or active and direct participation                              |                                                               |
|                                             | 2     | Non-state voting right                                                              |                                                               |
| Public access to information (transparency) | 0     | No information policy                                                               | (Donaldson and Kingsbury 2013; Grigorescu 2007), own research |
|                                             | 1     | Presence of information policy                                                      |                                                               |
| Parliamentary oversight                     | 0     | No institutionalized oversight, no relation with parliamentary associations         | (Rocabert et al. 2017), own research                          |
|                                             | 1     | Institutionalized relationships with parliamentary associations                     |                                                               |
|                                             | 2     | Presence of parliamentary assembly                                                  |                                                               |

To create the index, we simply add up the score of a given IO in a given year. As a result, the index ranges from zero for no democratic institutional features to eight for a high density of democratic institutional design features.

### *Politicization*

We test if public politicization shapes the use of democratic legitimation. We use two alternative measures, the public visibility of IOs and public visible protest against IOs. Both measures provide annual data for all IOs in the sample and the period between 1980-2011.

### *Media visibility*

We operationalize the media visibility of IOs with the help of data generated by keyword searches for the IO name or acronym in the online newspaper database *LexisNexis*. We use this information to create two alternative measures of media visibility for the period 1980-2011:

- Media visibility (total): number of hits for a keyword search in the New York Times (available since 1980), Jiji Press English News Service (available since 1981), Associated Press Newswires (available since 1985), Times of India (available since 1986), Reuters News (available since 1987), Xinhua General News Service (available since 1989), Inter Press Service (available since 1992), ITAR-TASS World Service (available since 1997), All Africa (available since 1998) for IO name and acronym per IO-year divided by the count of *Newshole-Articles*, that is, those articles that include either "and" or "or" or "the" or "of" or "a" published in the listed sources during the respective year. By dividing the number of hits by the total number of published articles, we correct for changes in the newshole of the selected corpus over time.
- Media visibility (NYT): number of hits for a keyword search in the New York Times for IO name and acronym per IO-year divided by the newshole.

### *Protest*

We operationalize protest against IOs with the help of data generated by keyword searches for the IO name or acronym and the terms “protestor” or “demonstrator” in the *Major World Newspapers* corpus of the online newspaper database *LexisNexis* (see also Tallberg et al. 2013). These searches produced a high number of hits unrelated to our IOs. Hence, we applied a second step of human coding and excluded those articles that did not refer to the IOs in the sample. We use this information to create a measure of protest against IOs for the period 1980-2011:

- Protest: number of articles for keyword searches during the respective year

The following correlation matrix illustrates that the total visibility and visibility in the New York Times measures are highly correlated. In addition, there is a positive correlation between media visibility and protest against IOs.

*Correlation matrix for politicization variables*

|                          | Media visibility (NYT) | Media visibility (total) | Protest |
|--------------------------|------------------------|--------------------------|---------|
| Media visibility (NYT)   |                        |                          |         |
| Media visibility (total) | 0.9124                 |                          |         |
| Protest                  | 0.3905                 | 0.4180                   |         |

### A.3.3 Controls

*Democracy mandate*

We check the founding documents (Treaties, Conventions) of IOs for direct references to democracy (as defined in the context of this study). We code years where such references are found with 1, other years with 0. To check for changes over time, we consulted changes in the founding documents during our period of examination.

*Legitimation intensity*

This indicator is based on our coding of IO annual reports (1980-2011). It reports the share of paragraphs containing identity and purpose statements of all coded paragraphs per IO-year.

*Participatory discourse*

This indicator is based on keyword searches using the **Google NGram Tool** which includes more than five million publications from the Google books database. The search routine includes the terms “participatory governance”, “democratic deficit”, and “global democracy”. The indicator reports the annual number of publications that include these terms for the period 1980-2010. We thank Tallberg and colleagues (2013) for providing the data.

## A4 Modelling

To model the causal relationships in our data, we use a negative binomial count model with a log link. In the following section, we present the various models we also discuss in the paper.

### A4.1 Final model (negative binomial regression, dependent variable: count of democratic legitimization, with different lagged DVs, IO dummies omitted from output)

|                                      | (1)<br>visibility, 3-<br>year rolling<br>mean | (2)<br>protest, 3-<br>year rolling<br>mean | (3)<br>visibility, 1-<br>year lagged<br>DV | (4)<br>protest, 1-<br>year lagged<br>DV        | (5)<br>visibility, no<br>lag/rolling<br>mean | (6)<br>protest, no<br>lag/rolling<br>mean |
|--------------------------------------|-----------------------------------------------|--------------------------------------------|--------------------------------------------|------------------------------------------------|----------------------------------------------|-------------------------------------------|
| Authority, scaled                    | -0.948<br>(0.716)                             | 0.298<br>(0.722)                           | -0.677<br>(0.812)                          | -0.016<br>(0.768)                              | -0.901<br>(0.809)                            | -0.256<br>(0.762)                         |
| Democratic density, scaled           | -0.133<br>(0.321)                             | 0.130<br>(0.328)                           | 0.054<br>(0.370)                           | 0.275<br>(0.359)                               | 0.108<br>(0.378)                             | 0.304<br>(0.363)                          |
| Weak IO members, scaled              | -0.602*<br>(0.264)                            | -0.601*<br>(0.287)                         | -0.341<br>(0.304)                          | -0.425<br>(0.310)                              | -0.294<br>(0.307)                            | -0.397<br>(0.310)                         |
| Inst. democratic features,<br>scaled | -0.200<br>(0.171)                             | -0.316<br>(0.186)                          | -0.091<br>(0.213)                          | -0.174<br>(0.215)                              | -0.031<br>(0.215)                            | -0.123<br>(0.216)                         |
| Media visibility (total),<br>scaled  | 0.533***<br>(0.116)                           |                                            | 0.372**<br>(0.135)                         |                                                | 0.337*<br>(0.136)                            |                                           |
| Protest, scaled                      |                                               | 0.087*<br>(0.041)                          |                                            | 0.123*<br>(0.048)                              |                                              | 0.130**<br>(0.048)                        |
| dem. leg. (3-year rolling<br>mean)   | 0.334***<br>(0.035)                           | 0.315***<br>(0.038)                        |                                            |                                                |                                              |                                           |
| dem. leg. (1-year lagged)            |                                               |                                            | 0.081*<br>(0.033)                          | 0.066*<br>(0.033)                              |                                              |                                           |
| Democracy mandate                    | 3.713***<br>(1.103)                           | 3.861**<br>(1.179)                         | 3.366**<br>(1.276)                         | 3.853**<br>(1.285)                             | 3.369**<br>(1.293)                           | 3.878**<br>(1.291)                        |
| Legitimation intensity, scaled       | -0.593<br>(0.504)                             | -0.537<br>(0.538)                          | 1.262*<br>(0.624)                          | 1.171<br>(0.623)                               | 1.959***<br>(0.563)                          | 1.718**<br>(0.556)                        |
| Participatory discourse,<br>scaled   | -0.0001<br>(0.0001)                           | -0.0001<br>(0.0001)                        | -0.0001<br>(0.0001)                        | -0.0001<br>(0.0001)                            | -0.0002<br>(0.0001)                          | -0.0001<br>(0.0001)                       |
| Year                                 | 0.087**<br>(0.031)                            | 0.077*<br>(0.032)                          | 0.096**<br>(0.034)                         | 0.088**<br>(0.034)                             | 0.099**<br>(0.035)                           | 0.090**<br>(0.034)                        |
| Constant                             | -181.033**<br>(60.929)                        | -161.118*<br>(63.742)                      | -198.516**<br>(68.151)                     | -182.288**<br>(67.103)                         | -203.686**<br>(69.132)                       | -186.732**<br>(67.594)                    |
| Observations                         | 460                                           | 460                                        | 477                                        | 477                                            | 477                                          | 477                                       |
| Log Likelihood                       | -411.335                                      | -417.897                                   | -463.550                                   | -464.245                                       | -466.169                                     | -465.945                                  |
| Theta                                | 26.410<br>(26.532)                            | 8.459*<br>(3.452)                          | 2.964***<br>(0.774)                        | 2.862***<br>(0.728)                            | 2.685***<br>(0.675)                          | 2.731***<br>(0.692)                       |
| AIC                                  | 880.670                                       | 893.793                                    | 985.100                                    | 986.490                                        | 988.337                                      | 987.890                                   |
| <i>Note:</i>                         |                                               |                                            |                                            | * $p < 0.05$ , ** $p < 0.01$ , *** $p < 0.001$ |                                              |                                           |

**A4.2 Robustness: Logistic regression model (dependent variable: dichotomous variable for democratic legitimization/no democratic legitimization, IO dummies omitted from output)**

|                                   | (1)<br>visibility                              | (2)<br>protest         |
|-----------------------------------|------------------------------------------------|------------------------|
| Authority, scaled                 | 4.931<br>(2.818)                               | 7.911*<br>(3.410)      |
| Inst. democratic features, scaled | -1.278*<br>(0.587)                             | -1.643**<br>(0.630)    |
| Democratic density, scaled        | -1.357<br>(0.813)                              | -1.157<br>(0.794)      |
| Weak IO members, scaled           | -0.278<br>(0.699)                              | -0.219<br>(0.699)      |
| Media visibility (total), scaled  | 0.809<br>(0.477)                               |                        |
| Protest, scaled                   |                                                | 1.366<br>(0.702)       |
| dem. leg. (3-year rolling mean)   | 2.233***<br>(0.361)                            | 2.198***<br>(0.365)    |
| Legitimation intensity, scaled    | -1.631<br>(1.564)                              | -1.846<br>(1.582)      |
| Participatory discourse, scaled   | -0.0001<br>(0.0003)                            | -0.0001<br>(0.0003)    |
| Democracy mandate                 | -0.640<br>(3.079)                              | -0.918<br>(3.201)      |
| Year                              | 0.193*<br>(0.088)                              | 0.185*<br>(0.087)      |
| Constant                          | -385.609*<br>(175.908)                         | -370.344*<br>(173.390) |
| Observations                      | 460                                            | 460                    |
| Log Likelihood                    | -131.763                                       | -131.071               |
| AIC                               | 321.527                                        | 320.143                |
| Note:                             | * $p < 0.05$ , ** $p < 0.01$ , *** $p < 0.001$ |                        |



**A4.3 Robustness: Authority (negative binomial regression, dependent variable: count of democratic legitimization, with three alternative specifications of the authority variable, IO dummies omitted from output)**

|                                                | (1)                    | (2)                   | (3)                    | (4)                                            | (5)                    | (6)                    |
|------------------------------------------------|------------------------|-----------------------|------------------------|------------------------------------------------|------------------------|------------------------|
|                                                | Visibility             | Protest               | Visibility             | Protest                                        | Visibility             | Protest                |
| Authority × intrusiveness, scaled              | -0.081<br>(0.614)      | 0.940<br>(0.572)      |                        |                                                |                        |                        |
| Authority in all areas, scaled                 |                        |                       | -0.864**<br>(0.266)    | -0.771**<br>(0.290)                            |                        |                        |
| Authority in all areas × intrusiveness, scaled |                        |                       |                        |                                                | -1.502**<br>(0.531)    | -1.144*<br>(0.576)     |
| Democratic density, scaled                     | -0.113<br>(0.326)      | 0.159<br>(0.326)      | -0.101<br>(0.319)      | 0.129<br>(0.327)                               | -0.153<br>(0.318)      | 0.087<br>(0.328)       |
| Weak IO members, scaled                        | -0.609*<br>(0.267)     | -0.605*<br>(0.285)    | -0.324<br>(0.274)      | -0.338<br>(0.296)                              | -0.432<br>(0.266)      | -0.449<br>(0.290)      |
| Inst. democratic features, scaled              | -0.221<br>(0.174)      | -0.299<br>(0.186)     | -0.221<br>(0.170)      | -0.327<br>(0.185)                              | -0.235<br>(0.169)      | -0.336<br>(0.185)      |
| Media visibility (total), scaled               | 0.465***<br>(0.120)    |                       | 0.507***<br>(0.100)    |                                                | 0.518***<br>(0.101)    |                        |
| Protest, scaled                                |                        | 0.089*<br>(0.040)     |                        | 0.080*<br>(0.040)                              |                        | 0.083*<br>(0.040)      |
| dem. leg. (3-year rolling mean)                | 0.338***<br>(0.036)    | 0.326***<br>(0.038)   | 0.335***<br>(0.034)    | 0.312***<br>(0.037)                            | 0.333***<br>(0.034)    | 0.310***<br>(0.037)    |
| Democracy mandate                              | 3.332**<br>(1.284)     | 4.921***<br>(1.300)   | 2.566*<br>(1.107)      | 3.193**<br>(1.178)                             | 0.347<br>(1.549)       | 1.593<br>(1.656)       |
| Legitimation intensity, scaled                 | -0.630<br>(0.511)      | -0.655<br>(0.535)     | -0.636<br>(0.497)      | -0.448<br>(0.529)                              | -0.654<br>(0.496)      | -0.460<br>(0.530)      |
| Participatory discourse, scaled                | -0.0001<br>(0.0001)    | -0.0001<br>(0.0001)   | -0.0001<br>(0.0001)    | -0.0001<br>(0.0001)                            | -0.0001<br>(0.0001)    | -0.0001<br>(0.0001)    |
| Year                                           | 0.085**<br>(0.031)     | 0.076*<br>(0.032)     | 0.086**<br>(0.030)     | 0.080*<br>(0.032)                              | 0.089**<br>(0.030)     | 0.081*<br>(0.032)      |
| Constant                                       | -177.064**<br>(61.590) | -159.731*<br>(63.245) | -177.278**<br>(59.715) | -164.919**<br>(63.067)                         | -182.204**<br>(59.804) | -167.540**<br>(63.386) |
| Observations                                   | 460                    | 460                   | 460                    | 460                                            | 460                    | 460                    |
| Log Likelihood                                 | -412.179               | -416.625              | -406.712               | -414.437                                       | -408.416               | -416.156               |
| Theta                                          | 19.368<br>(15.128)     | 9.046*<br>(3.864)     | 31.861<br>(35.131)     | 9.145*<br>(3.763)                              | 34.801<br>(42.345)     | 9.000*<br>(3.732)      |
| AIC                                            | 882.359                | 891.249               | 871.424                | 886.874                                        | 874.832                | 890.311                |
| Note:                                          |                        |                       |                        | * $p < 0.05$ , ** $p < 0.01$ , *** $p < 0.001$ |                        |                        |

**A4.4 Robustness: Democratic membership (negative binomial regression, dependent variable: count of democratic legitimation, with three alternative specifications of the democratic membership variable, IO dummies omitted from output)**

|                                   | (1)                 | (2)                 | (3)                 | (4)                                            | (5)                 | (6)                 |
|-----------------------------------|---------------------|---------------------|---------------------|------------------------------------------------|---------------------|---------------------|
|                                   | Visibility          | Protest             | Visibility          | Protest                                        | Visibility          | Protest             |
| Authority, scaled                 | -0.750<br>(0.747)   | 0.200<br>(0.719)    | -0.986<br>(0.714)   | 0.242<br>(0.718)                               | -0.929<br>(0.711)   | 0.291<br>(0.724)    |
| Democracy-Dictatorship, scaled    | 0.412<br>(0.464)    | 0.786<br>(0.450)    |                     |                                                |                     |                     |
| Young democracies, scaled         |                     |                     | 0.088<br>(0.076)    | 0.089<br>(0.082)                               |                     |                     |
| Major power democracies, scaled   |                     |                     |                     |                                                | 0.114<br>(0.369)    | -0.222<br>(0.440)   |
| Weak IO members, scaled           | -0.576<br>(0.307)   | -0.591<br>(0.325)   | -0.624*<br>(0.263)  | -0.611*<br>(0.286)                             | -0.626*<br>(0.265)  | -0.579*<br>(0.287)  |
| Inst. democratic features, scaled | -0.194<br>(0.187)   | -0.322<br>(0.197)   | -0.192<br>(0.169)   | -0.286<br>(0.184)                              | -0.206<br>(0.168)   | -0.318<br>(0.186)   |
| Media visibility (total), scaled  | 0.401**<br>(0.128)  |                     | 0.517***<br>(0.113) |                                                | 0.523***<br>(0.112) |                     |
| Protest, scaled                   |                     | 0.078<br>(0.042)    |                     | 0.082*<br>(0.041)                              |                     | 0.097*<br>(0.043)   |
| dem. leg. (3-year rolling mean)   | 0.325***<br>(0.040) | 0.309***<br>(0.041) | 0.328***<br>(0.035) | 0.315***<br>(0.038)                            | 0.331***<br>(0.034) | 0.318***<br>(0.038) |
| Democracy mandate                 | 4.314***<br>(1.268) | 4.861***<br>(1.332) | 3.933***<br>(0.932) | 3.601***<br>(1.007)                            | 4.020***<br>(0.942) | 3.548***<br>(1.019) |
| Legitimation intensity, scaled    | -0.527<br>(0.568)   | -0.475<br>(0.588)   | -0.542<br>(0.507)   | -0.511<br>(0.542)                              | -0.588<br>(0.502)   | -0.555<br>(0.541)   |
| Participatory discourse, scaled   | -0.0001<br>(0.0001) | -0.0001<br>(0.0001) | -0.0001<br>(0.0001) | -0.0001<br>(0.0001)                            | -0.0001<br>(0.0001) | -0.0001<br>(0.0001) |
| Year                              | 0.064<br>(0.037)    | 0.050<br>(0.037)    | 0.080***<br>(0.021) | 0.089***<br>(0.023)                            | 0.078***<br>(0.021) | 0.087***<br>(0.022) |
| Observations                      | 425                 | 425                 | 460                 | 460                                            | 457                 | 457                 |
| Log Likelihood                    | -367.448<br>16.997  | -370.122<br>9.168*  | -410.765<br>28.075  | -417.405<br>8.360*                             | -411.372<br>29.441  | -417.843<br>8.013*  |
| Theta                             | (12.675)            | (4.250)             | (28.888)            | (3.340)                                        | (32.277)            | (3.153)             |
| AIC                               | 792.896             | 798.245             | 879.530             | 892.809                                        | 880.744             | 893.686             |
| <i>Note:</i>                      |                     |                     |                     | * $p < 0.05$ , ** $p < 0.01$ , *** $p < 0.001$ |                     |                     |

**A4.5 Robustness: Economic inequality (negative binomial regression, dependent variable: count of democratic legitimization, with one alternative specification of the weak member state variable, IO dummies omitted from output)**

|                                    | (1)<br>Visibility                              | (2)<br>Protest      |
|------------------------------------|------------------------------------------------|---------------------|
| Authority, scaled                  | -0.941<br>(0.749)                              | 0.219<br>(0.741)    |
| Democratic density, scaled         | -0.200<br>(0.324)                              | 0.067<br>(0.329)    |
| Economic inequality (Gini), scaled | 0.462<br>(0.565)                               | 0.541<br>(0.577)    |
| Inst. democratic features, scaled  | -0.146<br>(0.177)                              | -0.257<br>(0.190)   |
| Media visibility (total), scaled   | 0.515***<br>(0.122)                            |                     |
| Protest, scaled                    |                                                | 0.075<br>(0.042)    |
| dem. leg. (3-year rolling mean)    | 0.340***<br>(0.037)                            | 0.325***<br>(0.039) |
| Democracy mandate                  | 1.362<br>(1.169)                               | 1.428<br>(1.209)    |
| Legitimation intensity, scaled     | -0.491<br>(0.524)                              | -0.426<br>(0.551)   |
| Participatory discourse, scaled    | -0.0002<br>(0.0001)                            | -0.0001<br>(0.0001) |
| Year                               | 0.079*<br>(0.031)                              | 0.068*<br>(0.032)   |
| Observations                       | 460                                            | 460                 |
| Log Likelihood                     | -413.312<br>13.078                             | -419.477<br>6.641** |
| Theta                              | (7.266)                                        | (2.274)             |
| AIC                                | 884.624                                        | 896.954             |
| Note:                              | * $p < 0.05$ , ** $p < 0.01$ , *** $p < 0.001$ |                     |

## A5: Table: Types of arguments linked to democratic legitimization

The following table provides an overview of the types of arguments in our sample that are linked to democratic legitimization and correspond to our explanatory models.

| Model                             | Type of argument                                                                                                                                                    | Organizations                                      |
|-----------------------------------|---------------------------------------------------------------------------------------------------------------------------------------------------------------------|----------------------------------------------------|
| Authority and democratic features | Democracy promotion (or the promotion of a single democratic value) is a core value or core objective of the organization                                           | CON, ILO, OECD, OSCE, World Bank, UNESCO           |
|                                   | Specific institutional bodies attest to the organization's commitment to democracy or to specific democratic values                                                 | GEF, OSCE, World Bank, UN                          |
|                                   | (Changes in) Decision-making rules in institutional bodies attest to the democratic quality of the organization                                                     | IMF, ILO, IWC, World Bank, WTO, UN                 |
|                                   | Access for and/or interaction with civil society organizations demonstrate commitment to democratic value(s)                                                        | CON, GEF, UN, WTO                                  |
|                                   | Specific declarations, decisions, reports or rules adopted by the organization demonstrate a commitment to democratic value(s)                                      | CON, IMF, OSCE, WTO, UNIDO                         |
|                                   | Specific policies, activities, strategies, programs or events demonstrate a commitment to democratic value(s)                                                       | CON, GEF, ICC, ILO, World Bank, UNESCO, UNIDO, WTO |
|                                   | Growth of the organization and/or its authority make transparency and accountability necessary / (Increasingly) global reach triggers greater inclusiveness         | OSCE, UN / BIS                                     |
| Membership                        | Democratic membership makes democracy promotion – as well as the assistance for young democracies – an important goal                                               | CON, ILO, OECD, UN                                 |
|                                   | Democratic membership provides the basis for a democratic IO                                                                                                        | CON                                                |
|                                   | Economic inequality is a threat to democracy – the IO is committed to reversing it / LDC members require special assistance to enable them to exercise their rights | CON; WTO                                           |
| Politicization                    | Public interest triggers heightened attention to the transparency of the IO                                                                                         | BIS, WTO                                           |
|                                   | Protest triggers heightened attention to the transparency of IO                                                                                                     | IMF, WTO                                           |

## A6 References

- Blake, D. J., & Payton, A. L. (2015). Balancing Design Objectives: Analyzing New Data on Voting Rules in Intergovernmental Organizations. *The Review of International Organizations*, 10(3), 377–402. doi:10.1007/s11558-014-9201-9
- Cheibub, J. A., Gandhi, J., & Vreeland, J. R. (2010). Democracy and Dictatorship Revisited. *Public Choice*, 143(1–2), 67–101. doi:10.1007/s11127-009-9491-2
- Donaldson, M., & Kingsbury, B. (2013). The Adoption of Transparency Policies in Global Governance Institutions: Justifications, Effects, and Implications. *Annual Review of Law and Social Science*, 9(1), 119–147. doi:https://doi.org/10.1146/annurev-lawsocsci-102811-173840
- Feenstra, R. C., Inklaar, R., & Timmer, M. P. (2015). The Next Generation of the Penn World Table. *American Economic Review*, 105(10), 3150–3182. doi:10.1257/aer.20130954
- Grigorescu, A. (2007). Transparency of Intergovernmental Organizations: The Roles of Member States, International Bureaucracies and Nongovernmental Organizations. *International Studies Quarterly*, 51(3), 625–648. doi:10.1111/j.1468-2478.2007.00467.x
- Hooghe, L., Marks, G., Lenz, T., Bezuijen, J., Ceka, B., & Derderyan, S. (2017). *Measuring International Authority. A Postfunctionalist Theory of Governance, Volume III*. Oxford: Oxford University Press.
- Marshall, M. G., Jaggers, K., & Gurr, T. R. (2016). *Polity IV Project: Political Regime Characteristics and Transitions, 1800–2015*. Vienna: Center for Systemic Peace.
- Pevehouse, J. C., Nordstrom, T., & Warnke, K. (2004). The Correlates of War 2 International Governmental Organizations Data Version 2.0. *Conflict Management and Peace Science*, 21(2), 101–119. doi:10.1080/07388940490463933

- Rocabert, J., Schimmelfennig, F., Winzen, T., & Crasnic, L. (2017). The Rise of International Parliamentary Institutions: Authority and Legitimacy. *unpublished ms.*
- Tallberg, J., Sommerer, T., Squatrito, T., & Jönsson, C. (2013). *The Opening Up of International Organizations. Transnational Access in Global Governance.* Cambridge: Cambridge University Press.
- United Nations Committee for Development (2017) List of Least Developed Countries. Available at: [https://www.un.org/development/desa/dpad/wp-content/uploads/sites/45/publication/ldc\\_list.pdf](https://www.un.org/development/desa/dpad/wp-content/uploads/sites/45/publication/ldc_list.pdf).
- Volgy, T. J., Fausett, E., Grant, K. A., & Rodgers, S. (2008). Identifying Formal Intergovernmental Organizations. *Journal of Peace Research*, 45(6), 837–850. doi:10.1177/0022343308096159
